# Supplementary figures and images for: Integrative Taxonomy of the Spinous Assassin Bug Genus Sclomina (Heteroptera: Reduviidae: Harpactorinae) Reveals Three Cryptic Species Based on DNA Barcoding and Morphological Evidence
Source: MDPI journal article supplement (doi:10.3390/insects12030251), 2021-03-16

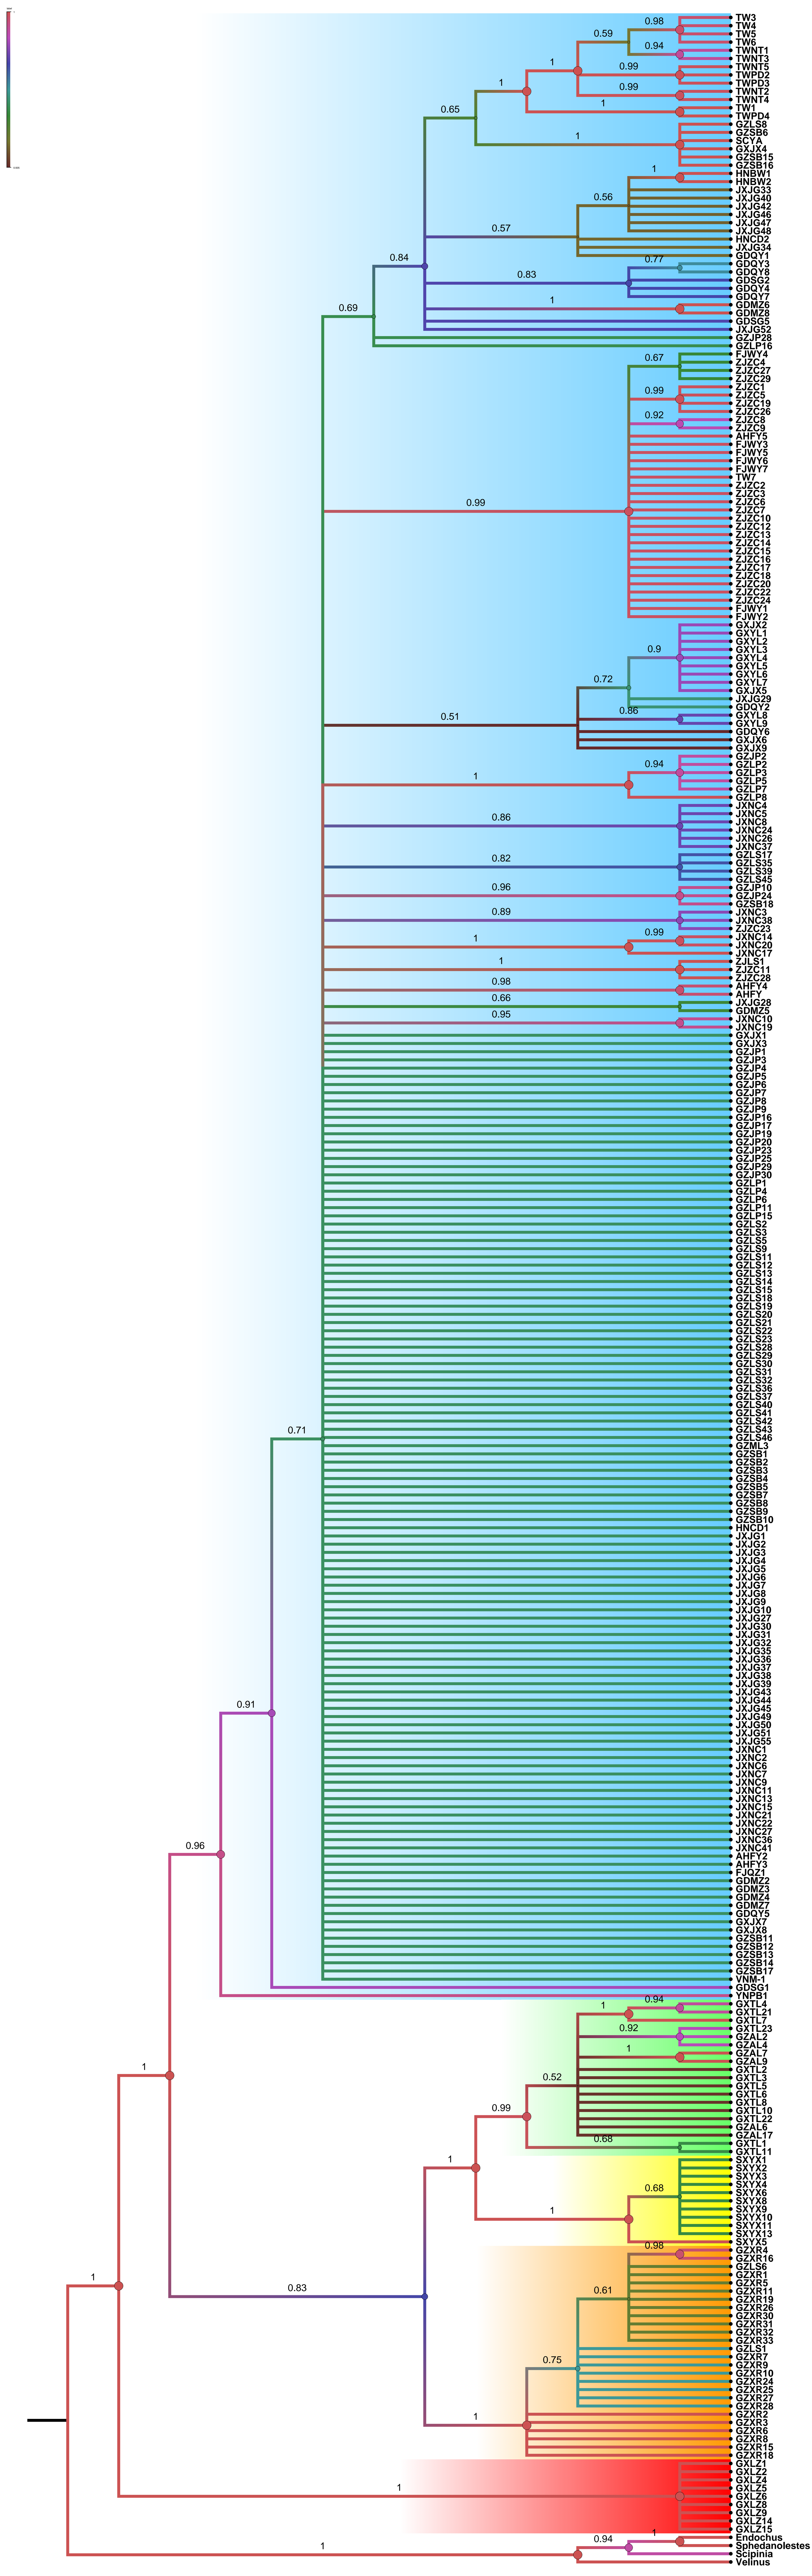

Supplement: s1 [file s1]
